# Supplementary material
Source: Royal Society of Chemistry journal article supplement (doi:10.1039/d6fo00815a)
Supplement: d6fo00815a1.pdf [file d6fo00815a1.pdf]

## Supplementary Information

### **Cinnamaldehyde, a major bioactive component of cinnamon bark, enhances social approach behavior associated with a liver–brain FGF21–isotocin axis in zebrafish**

**Yukiko Nishi <sup>a</sup>, Momoko Kawabe <sup>b</sup>, Seiwa Michihara <sup>b</sup>, Shigeki Chiba <sup>b</sup>, Yuko Kamada-Futagami <sup>a</sup>, Toshiki Hyodo <sup>c</sup>, Akio Inui <sup>d</sup>, Kazuhiro Shiozaki <sup>a,c\*</sup>**

<sup>a</sup> Department of Food Life Sciences, Faculty of Fisheries, Kagoshima University, Kagoshima, 890-0056, Japan

<sup>b</sup> Kampo Research Laboratories, Kracie, Ltd., Toyama, Japan

<sup>c</sup> Course of Biological Science and Technology, The United Graduate School of Agricultural Sciences, Kagoshima University, Kagoshima, Japan

<sup>d</sup> Department of Pharmacological Sciences of Herbal Medicine, Graduate School of Medical and Dental Sciences, Kagoshima University, Kagoshima, Japan

**Supplementary Table 1 Primers used in this study**

**Supplementary Fig. 1 p-CREB and CREB expression pattern in zebrafish brain with CA treatment.** Uncropped blot images using anti-p-CREB and CREB shown in Fig. 4.

**Supplementary Table 2 Sample number used in this study**

p-CREB

CREB

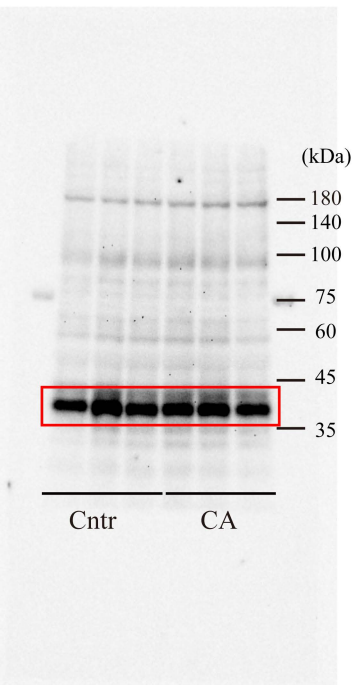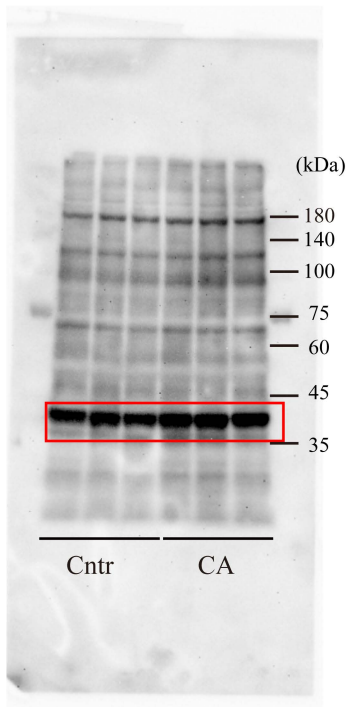

Supplementary Fig. 1

**Supplementary Table 1 Primers used in this study**

| <b>Gene</b>    | <b>Primers</b>         |                          |
|----------------|------------------------|--------------------------|
| <i>efla</i>    | GTGCTGGCAAGGTCACAAAG   | AGAGGTTGGGAAGAACACGC     |
| <i>actb</i>    | CGCCATACAGAGCAGAAGCCA  | AGCACCCCTGTGCTGCTCACT    |
| <i>ist</i>     | TCTGGAAAGGCCTGCCCTTA   | GCTGTTGGCCGGTTGATTGA     |
| <i>avp</i>     | CGCTCTCGTCTGCCTGCTAC   | TCTTAAGTCCCGCGCTGCTG     |
| <i>oxtra</i>   | CACCCAAAGCATCCAAAGGC   | GACCACATCTGCACGGAGAA     |
| <i>oxtrb</i>   | ACCAAACCTGTGAACCCCCTG  | CTGGCCGTGTTTACTCGTCT     |
| <i>avpr1aa</i> | TATAAGAGCAAGCGGACGCA   | CCAGCAGATGACATAGGCGA     |
| <i>avpr1ab</i> | ACCAAATCACGGCGAACAAC   | CACAGATTTCCGACAACCGC     |
| <i>gr</i>      | AGCCGGAAAGGTAATCCAGC   | TCCAGCCCAGTCCAAAAGAC     |
| <i>mr</i>      | CCCATTGAGGACCAAATCAC   | AGTAGAGCATTGGGGCGTTG     |
| <i>crh</i>     | TCGTCCATGATCTTGC GGTT  | GAATCTGCACGTGGTTGTCTG    |
| <i>npy</i>     | AAGATGTGGATGAGCTGGGC   | TGAATAATACTTGGCGAGCTCCT  |
| <i>cckb</i>    | AGCGTCAACCACCGGATAAA   | AGAGGACAGACGGAAACACG     |
| <i>trpv1</i>   | TTCGAATTTGTTTCCCTGGC   | ATTAGAGGCAGCACCGGAAG     |
| <i>trkb</i>    | GACCTCGTACTTGCCCCAAA   | GGATGTCCAGGTACACAGGC     |
| <i>bdnf</i>    | TTCTGAGCACGGCAGAAGTT   | ACCTGTTGGAACATTTTCCCCTAT |
| <i>creb1</i>   | CGAGTCTGTGTCGGGCTATC   | CTTGTGCCAAGGTGGCAATC     |
| <i>fgf21</i>   | CTCTACCTCTGCGTCGATGA   | ACGAATATCCATCCAGTAGCA    |
| <i>klb</i>     | ACAGACAGTCCGAGACAACG   | GGATGCAGACGCACCTGTAATA   |
| <i>fgfr1</i>   | ATCACTCTGCATGGTTGACTGT | TCACACAGATGAGGAAGAAGCC   |
| <i>th1</i>     | TACATACGGCACGCTTCCTC   | GAACCGCACAGAAAACGGTC     |
| <i>th2</i>     | AAAGGCTTATGGGGCTGGAC   | GCTGCAAGTGTAGGGGTCAT     |
| <i>slc6a3</i>  | GCAGAACTTGTAGAAGGCGT   | TAGCTTCGCCACCTTCAATC     |
| <i>slc6a2</i>  | TCTTGTTCTATGGCGTGGA    | TCCGGAGGTAACAATGCTGG     |
| <i>slc6a4a</i> | AACAACCGATGGAACACTCC   | CAACACCTGCCGGACATAA      |
| <i>htr1aa</i>  | TGGTCCTTTACGGACGGATA   | GAGACACCGCCAAGCATTTA     |
| <i>p11</i>     | TGCCATCCGAACTAGAGACC   | CCAGAGAGCTCGTTCTCCAT     |
| <i>tph1a</i>   | CGAGTAAAAGCGACGGGCCA   | TTCTTCGGGAACCACGGCAC     |
| <i>gad1b</i>   | GCTACCAACCACAGGGAGAC   | CACAACGTGAAACATAGCCG     |
| <i>gad2</i>    | AACTTACCGCACCAAAACCT   | CCCACAACGACGCTACCATA     |
| <i>gabrala</i> | CCGTCTCAACCAGTATGACTT  | TGACAACATACTCTCCAGTGCT   |

**Supplementary Table 2 Sample number used in this study**

|          | Figure | Treatment      | Initial n | Final n | Excluded n | Reason for exclusion                  | (Statistically excluded values)   |  |
|----------|--------|----------------|-----------|---------|------------|---------------------------------------|-----------------------------------|--|
| Fig. 1   | F      | Cntr           | 11        | 11      | 0          |                                       |                                   |  |
|          |        | Cinnnamon bark | 11        | 7       | 4          | Immobility:3<br>Statistical outlier:1 | 0.71                              |  |
|          | G      | Cntr           | 11        | 10      | 1          | Statistical outlier:1                 | 68.0                              |  |
|          |        | Cinnnamon bark | 11        | 8       | 3          | Immobility:3                          |                                   |  |
|          | H      | Cntr           | 11        | 10      | 1          | Statistical outlier:1                 | 68.4                              |  |
|          |        | Cinnnamon bark | 11        | 8       | 3          | Immobility:3                          |                                   |  |
| Fig. 2   | E      | Cntr           | 12        | 10      | 2          | Immobility:2                          |                                   |  |
|          |        | CA-5           | 12        | 12      | 0          |                                       |                                   |  |
|          |        | CA-25          | 12        | 11      | 1          | Immobility:1                          |                                   |  |
|          |        | CA-50          | 12        | 12      | 0          |                                       |                                   |  |
|          | F      | Cntr           | 12        | 10      | 2          | Immobility:2                          |                                   |  |
|          |        | CA-5           | 12        | 11      | 1          | Statistical outlier:1                 | 150                               |  |
|          |        | CA-25          | 12        | 11      | 1          | Immobility:1                          |                                   |  |
|          |        | CA-50          | 12        | 12      | 0          |                                       |                                   |  |
|          | G      | Cntr           | 12        | 10      | 2          | Immobility:2                          |                                   |  |
|          |        | CA-5           | 12        | 11      | 1          | Statistical outlier:1                 | 150                               |  |
|          |        | CA-25          | 12        | 11      | 1          | Immobility:1                          |                                   |  |
|          |        | CA-50          | 12        | 12      | 0          |                                       |                                   |  |
| Fig. 3   | D      | Cntr           | 6         | 6       | 0          |                                       |                                   |  |
|          |        | CA             | 6         | 6       | 0          |                                       |                                   |  |
|          | E      | Cntr           | 6         | 6       | 0          |                                       |                                   |  |
|          |        | CA             | 6         | 6       | 0          |                                       |                                   |  |
|          | F      | Cntr           | 6         | 6       | 0          |                                       |                                   |  |
|          |        | CA             | 6         | 6       | 0          |                                       |                                   |  |
| Fig. 4   | C      | Cntr           | 6         | 5       | 1          | Immobility:1                          |                                   |  |
|          |        | CA             | 6         | 5       | 1          | Immobility:1                          |                                   |  |
|          | D      | Cntr           | 6         | 5       | 1          | Immobility:1                          |                                   |  |
|          |        | CA             | 6         | 5       | 1          | Immobility:1                          |                                   |  |
|          | E      | trkb-Cntr      | 6         | 5       | 1          | Failed melting curve validation:1     |                                   |  |
|          |        | trkb-CA        | 6         | 5       | 1          | Statistical outlier:1                 | 0.25                              |  |
|          |        | bdnf-Cntr      | 6         | 6       | 0          |                                       |                                   |  |
|          |        | bdnf-CA        | 6         | 6       | 0          |                                       |                                   |  |
|          |        | creb1-Cntr     | 6         | 6       | 0          |                                       |                                   |  |
|          |        | creb1-CA       | 6         | 6       | 0          |                                       |                                   |  |
|          | G      | Cntr           | 3         | 3       | 0          |                                       |                                   |  |
|          |        | CA             | 3         | 3       | 0          |                                       |                                   |  |
|          | Fig.5  | A              | ist-Cntr  | 12      | 12         | 0                                     |                                   |  |
|          |        |                | ist-CA    | 12      | 10         | 2                                     | Failed melting curve validation:2 |  |
| avt-Cntr |        |                | 12        | 12      | 0          |                                       |                                   |  |
| Avt-CA   |        |                | 12        | 11      | 1          | Failed melting curve validation:1     |                                   |  |
| B        |        | oxtra-Cntr     | 6         | 6       | 0          |                                       |                                   |  |
|          |        | oxtra-CA       | 6         | 6       | 0          |                                       |                                   |  |
|          |        | oxtrb-Cntr     | 6         | 6       | 0          |                                       |                                   |  |
|          |        | oxtrb-CA       | 6         | 6       | 0          |                                       |                                   |  |
|          |        | avplaa-Cntr    | 6         | 5       | 1          | Failed melting curve validation:1     |                                   |  |
|          |        | avplaa-CA      | 6         | 6       | 0          |                                       |                                   |  |
|          |        | avplab-Cntr    | 6         | 5       | 1          | Failed melting curve validation:1     |                                   |  |
|          |        | avplab-CA      | 6         | 6       | 0          |                                       |                                   |  |
| C        |        | Cntr           | 9         | 8       | 1          | Immobility:1                          |                                   |  |

|            |        |              |    |    |                       |                                       |       |
|------------|--------|--------------|----|----|-----------------------|---------------------------------------|-------|
|            |        | CA           | 9  | 9  | 0                     |                                       |       |
|            |        | L368899-Cntr | 9  | 9  | 0                     |                                       |       |
|            |        | L368899-CA   | 9  | 7  | 2                     | Immobility:1<br>Statistical outlier:1 | 3.69  |
| Fig. 6     | D      | Cntr         | 8  | 8  | 0                     |                                       |       |
|            |        | CA           | 8  | 8  | 0                     |                                       |       |
|            | E      | Cntr         | 8  | 8  | 0                     |                                       |       |
|            |        | CA           | 8  | 8  | 0                     |                                       |       |
|            | F      | Cntr         | 8  | 8  | 0                     |                                       |       |
|            |        | CA           | 8  | 8  | 0                     |                                       |       |
|            | G      | Cntr         | 8  | 8  | 0                     |                                       |       |
|            |        | CA           | 8  | 8  | 0                     |                                       |       |
|            | H      | Cntr         | 8  | 8  | 0                     |                                       |       |
|            |        | CA           | 8  | 8  | 0                     |                                       |       |
|            | I      | slc6a4a-Cntr | 6  | 6  | 0                     |                                       |       |
|            |        | slc6a4a-CA   | 6  | 6  | 0                     |                                       |       |
|            |        | ht1aa-Cntr   | 6  | 6  | 0                     |                                       |       |
|            |        | ht1aa-CA     | 6  | 6  | 0                     |                                       |       |
|            |        | p11-Cntr     | 6  | 6  | 0                     |                                       |       |
|            |        | p11-CA       | 6  | 6  | 0                     |                                       |       |
|            |        | tph1a-Cntr   | 6  | 5  | 1                     | Failed melting curve validation:1     |       |
|            | J      | tph1a-CA     | 6  | 5  | 1                     | Failed melting curve validation:1     |       |
|            |        | th1-Cntr     | 6  | 5  | 1                     | Failed melting curve validation:1     |       |
|            |        | th1-CA       | 6  | 6  | 0                     |                                       |       |
|            |        | th2-Cntr     | 6  | 5  | 1                     | Failed melting curve validation:1     |       |
|            |        | th2-CA       | 6  | 6  | 0                     |                                       |       |
|            |        | slc6a2-Cntr  | 6  | 5  | 1                     | Failed melting curve validation:1     |       |
|            |        | slc6a2-CA    | 6  | 6  | 0                     |                                       |       |
|            | K      | slc6a3-Cntr  | 6  | 6  | 0                     |                                       |       |
|            |        | slc6a3-CA    | 6  | 6  | 0                     |                                       |       |
|            |        | gr-Cntr      | 6  | 5  | 1                     | Failed melting curve validation:1     |       |
|            |        | gr-CA        | 6  | 6  | 0                     |                                       |       |
|            |        | mr-Cntr      | 6  | 5  | 1                     | Failed melting curve validation:1     |       |
|            |        | mr-CA        | 6  | 6  | 0                     |                                       |       |
| crh-Cntr   |        | 6            | 5  | 1  | Statistical outlier:1 | 0.39                                  |       |
| crh-CA     |        | 6            | 6  | 0  |                       |                                       |       |
| npv-Cntr   |        | 6            | 6  | 0  |                       |                                       |       |
| npv-CA     |        | 6            | 6  | 0  |                       |                                       |       |
| cckb-Cntr  |        | 6            | 6  | 0  |                       |                                       |       |
| cckb-CA    |        | 6            | 6  | 0  |                       |                                       |       |
| gad1b-Cntr |        | 6            | 6  | 0  |                       |                                       |       |
| gad1b-CA   |        | 6            | 6  | 0  |                       |                                       |       |
| Fig.7      | A      | Cntr         | 12 | 12 | 0                     |                                       |       |
|            |        | CA           | 12 | 12 | 0                     |                                       |       |
|            | B      | Cntr         | 10 | 10 | 0                     |                                       |       |
|            |        | CA           | 10 | 9  | 1                     | Statistical outlier:1                 | 10.57 |
|            | C      | Cntr         | 6  | 6  | 0                     |                                       |       |
| CA         |        | 6            | 5  | 1  | Statistical outlier:1 | 0.25                                  |       |
| D          | Saline | 8            | 8  | 0  |                       |                                       |       |
|            |        | gabrala-Cntr | 6  | 6  | 0                     |                                       |       |
|            |        | gabrala-CA   | 6  | 5  | 1                     | Statistical outlier:1                 | 0.24  |

|   |          |    |    |   |                                   |
|---|----------|----|----|---|-----------------------------------|
|   | FGF21    | 8  | 6  | 2 | Immobility:2                      |
| E | Saline   | 10 | 10 | 0 |                                   |
|   | FGF21    | 10 | 10 | 0 |                                   |
| F | Saline   | 10 | 9  | 1 | Failed melting curve validation:1 |
|   | FGF21    | 10 | 10 | 0 |                                   |
| G | Cntr     | 10 | 10 | 0 |                                   |
|   | Pon-Cntr | 10 | 10 | 0 |                                   |
|   | Pon-CA   | 10 | 10 | 0 |                                   |

---
